# Supplementary material for: Improved Detection and Fragmentation of Disulphide-Linked Peptides
Source: MDPI journal article supplement (doi:10.3390/mps1030033), 2018-09-03
Supplement: s1 [file s1]

A)

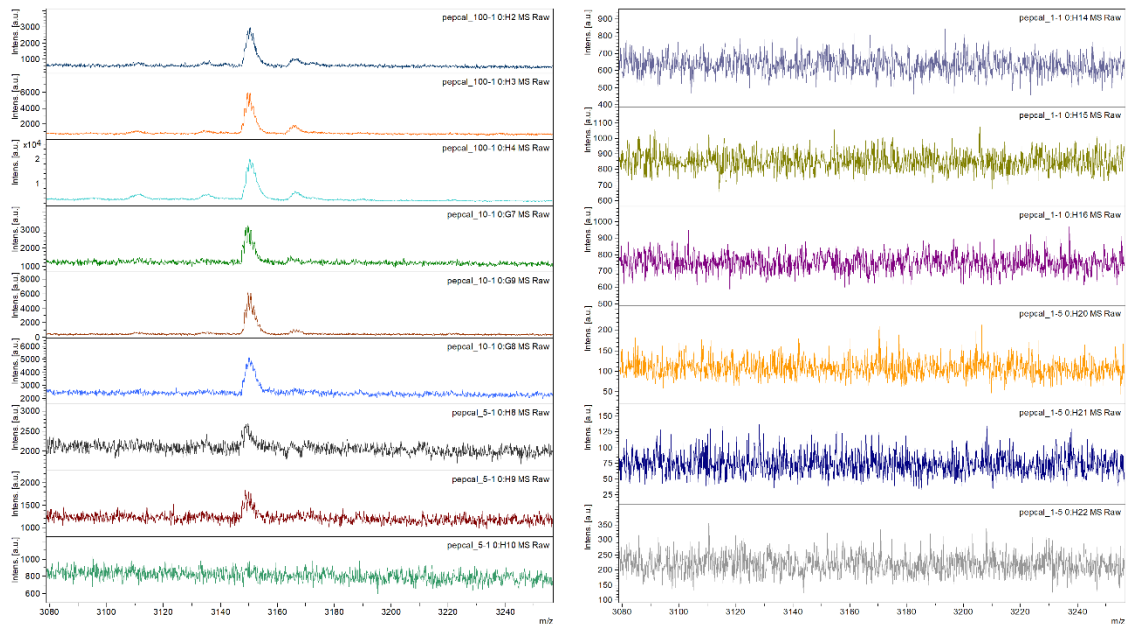

B)

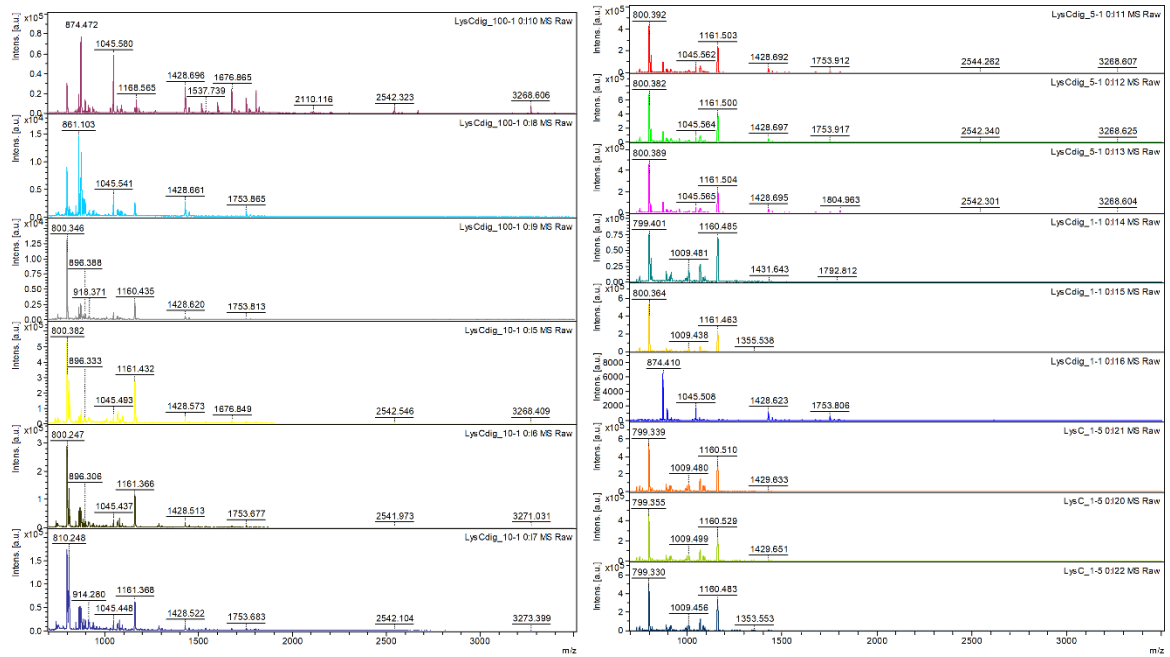

**Figure S1.** Supplementary figure S1A displays the signal intensities of Somatostatin 28 measured with different MALDI HCCA matrix:aniline ratios. In supplementary figure S1B, the HCCA-matrix:aniline ratio comparison for the Lysozyme C digest is displayed.
